# Supplementary material for: Implementation of a medical education programme for addictions MDT members to improve knowledge and confidence in managing substance users with complex comorbidities
Source: HighWire-hosted journal article supplement (doi:10.1136/bmjoq-2020-001112), 2020-12-01
Supplement: bmjoq-2020-001112supp002_data_supplement.pdf [file bmjoq-2020-001112supp002_data_supplement.pdf]

**Appendix 2****Teaching session feedback form**

|                                                                                                                                                             |  |
|-------------------------------------------------------------------------------------------------------------------------------------------------------------|--|
| <b>Date</b>                                                                                                                                                 |  |
| <b>Title of teaching</b>                                                                                                                                    |  |
| <b>MDT role</b>                                                                                                                                             |  |
| <b>Please rate your agreement with the following statements:<br/>Put a number between 1 and 10 in the box: 1=Strongly disagree, 10=Strongly agree</b>       |  |
| The session was useful                                                                                                                                      |  |
| The content of the session was appropriate                                                                                                                  |  |
| The session was interesting                                                                                                                                 |  |
| I feel that I learnt something new during the session                                                                                                       |  |
| My teacher was engaged, and I received appropriate feedback                                                                                                 |  |
| <b>Please rate your confidence in knowledge regarding the topic<br/>Put a number between 1 and 10 in the box: 1=Not at all confident, 10=Very confident</b> |  |
| Before the session                                                                                                                                          |  |
| After the session                                                                                                                                           |  |
| <b>Did you have any specific concerns prior to this session?</b>                                                                                            |  |
| <b>If yes, what, and were they addressed?</b>                                                                                                               |  |

*Implementation of a medical education programme for addictions MDT members*

|                                                          |
|----------------------------------------------------------|
| <b>What did you like particularly about the session?</b> |
| <b>What improvements could be made next time?</b>        |
| <b>Any further comments?</b>                             |
